# Supplementary material for: Enhanced photoelectrochemical water oxidation over a surface-hydroxylated BiVO4photoanode: advantageous charge separation and water dissociation
Source: Royal Society of Chemistry journal article supplement (doi:10.1039/d2nj04470f), 2022-11-21
Supplement: d2nj04470f1.pdf [file d2nj04470f1.pdf]

## Supporting Information

### **Enhanced photoelectrochemical water oxidation over a surface hydroxylated BiVO<sub>4</sub> photoanode: advantageous charge separation and water dissociation**

Yaru Li<sup>a</sup>, Fangxia Xie<sup>a</sup>, Zijun Sun<sup>a</sup>, Zhuobin Yu<sup>b</sup>, Jianxin Liu<sup>a</sup>, Xiaochao Zhang<sup>a</sup>, Yawen Wang<sup>a</sup>,  
Yunfang Wang<sup>a</sup>, Rui Li<sup>a,c,\*</sup>, Caimei Fan<sup>a,\*</sup>

*<sup>a</sup>College of Chemical Engineering and Technology, Taiyuan University of Technology,  
Taiyuan 030024, PR China*

*<sup>b</sup>Instrumental Analysis Center, Taiyuan University of Technology, Taiyuan 030024, PR  
China*

*<sup>c</sup>College of Environmental Science and Engineering, Taiyuan University of Technology,  
Taiyuan 030024, PR China*

*\*Corresponding author*

*Email address: lirui13233699182@163.com (R. Li); fancm@163.com (C.M. Fan)*

**Expressions used for the analysis [1]:**

**Applied bias photo-to-current efficiency (ABPE):**

The applied bias photon-to-current efficiency of the different photoanodes was determined using the equation:

$$ABPE(\%) = \frac{J \times (1.23 - E_b)}{P_{total}} \times 100\% \quad (E1)$$

where J is the photocurrent density ( $\text{mA cm}^{-2}$ ) obtained from the LSV curve,  $P_{total}$  is the incident light intensity of the solar simulator ( $120 \text{ mW cm}^{-2}$ ), and  $E_b$  is the applied potential versus RHE (V).

**Incident photon-to-current conversion efficiency (IPCE):**

From the region of 420-700 nm excitation wavelengths at 1.23 V vs.RHE, the incident photon-to-current conversion efficiency (IPCE) was evaluated under chopped monochromator with a 300 W Xe lamp as the simulated light source (PLS-SXE 300+, Perfect Light, China) as:

$$IPCE(\%) = \frac{J \times 1240}{\lambda \times P_{light}} \times 100\% \quad (E2)$$

where J is the photocurrent density ( $\text{mA cm}^{-2}$ ) under illumination at a given wavelength, and  $P_{light}$  is the power density ( $\text{mW cm}^{-2}$ ) of monochromatic light acquired at a given wavelength ( $\lambda$ ).

**Light harvesting efficiencies (LHE):**

The efficiency of light harvesting may be represented as:

$$LHE(\lambda) = 1 - 10^{-A(\lambda)} \quad (E3)$$

where  $A(\lambda)$  is the absorbance at specific wavelength  $\lambda$ .

**The bulk charge separation ( $\eta_{sep}$ ) and surface charge injection efficiency ( $\eta_{inj}$ ):**

The measured water splitting photocurrent can be expressed as:

$$J_{PEC} = J_{abs} \bullet \eta_{sep} \bullet \eta_{inj} \quad (E4)$$

$J_{abs}$  is the photocurrent density ( $\text{mA cm}^{-2}$ ) if all absorbed photons can be converted to current. The following equation can be used to estimate  $J_{abs}$ :

$$J_{abs} = J_{max} \bullet LHE \quad (E5)$$

where LHE is light harvesting efficiency, and  $J_{max}$  is maximum photocurrent density ( $\text{mA cm}^{-2}$ ) achievable assuming 100% IPCE for photons with energy  $\geq E_g$ .

Surface recombination of the charge carriers may be entirely inhibited in the presence of hole scavenger  $\text{Na}_2\text{SO}_3$ , without affecting charge separation in the electrode bulk ( $\eta_{\text{inj}}=100\%$ ). As a result, the  $\eta_{\text{sep}}$  and  $\eta_{\text{inj}}$  may be computed using the formulae below:

$$\eta_{\text{sep}} = \frac{J_{\text{Na}_2\text{SO}_3}}{J_{\text{abs}}} \quad (\text{E6})$$

$$\eta_{\text{inj}} = \frac{J_{\text{Na}_2\text{SO}_4}}{J_{\text{Na}_2\text{SO}_3}} \quad (\text{E7})$$

where  $J_{\text{Na}_2\text{SO}_3}$  is the photocurrent density ( $\text{mA cm}^{-2}$ ) measured in the electrolyte of 0.1 M  $\text{Na}_2\text{SO}_4$  with 0.1 M  $\text{Na}_2\text{SO}_3$ , and  $J_{\text{Na}_2\text{SO}_4}$  is the photocurrent density ( $\text{mA cm}^{-2}$ ) obtained in 0.1 M  $\text{Na}_2\text{SO}_4$  electrolyte.

**Supplementary figures and tables:**

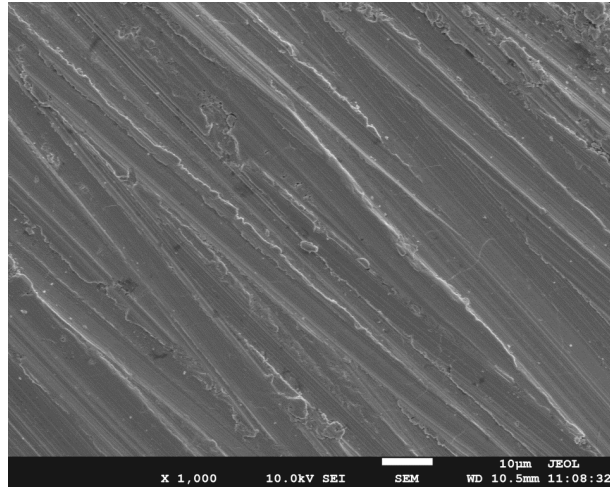

Fig. S1 SEM image of the metal Bi substrate.

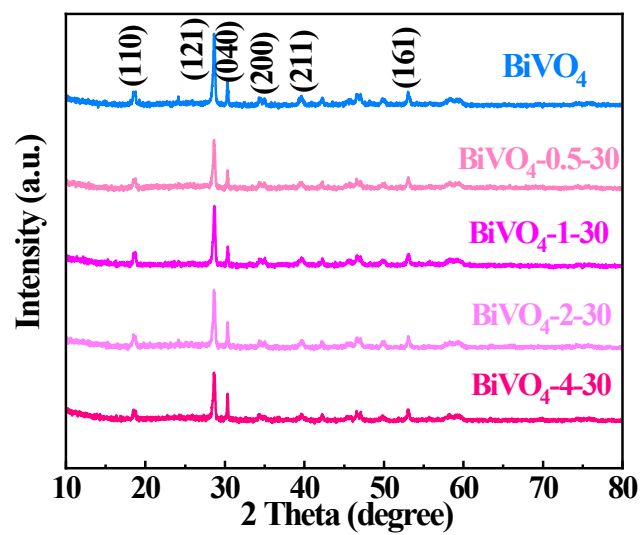

Fig. S2 XRD patterns of the prepared samples treated with different concentration NaOH solutions.

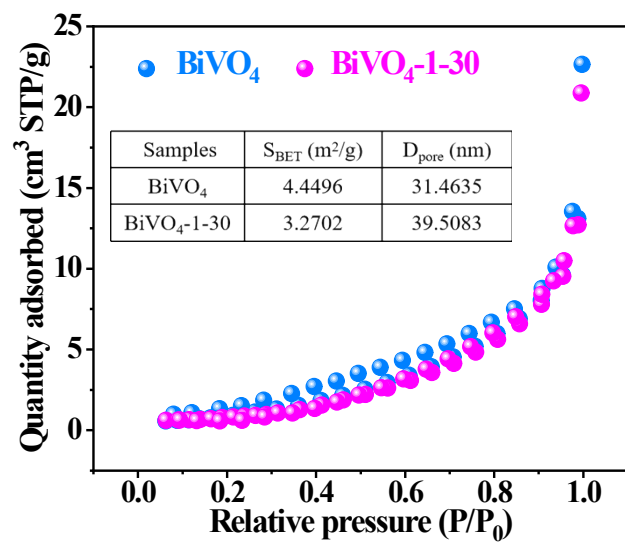

Fig. S3 The N<sub>2</sub> adsorption-desorption isotherms and the inset of the related parameters of bare BiVO<sub>4</sub> and BiVO<sub>4</sub>-1-30 photoanodes.

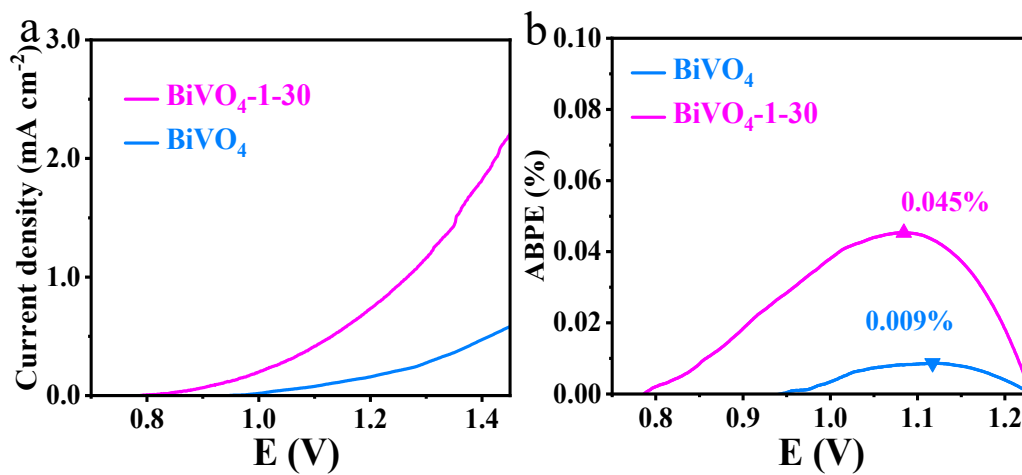

Fig. S4 (a) LSV and (b) ABPE curves performed in the two-electrode configuration, in which the Pt wire is as counter electrode and the bare BiVO<sub>4</sub> and BiVO<sub>4</sub>-1-30 photoanodes are as working electrode, respectively.

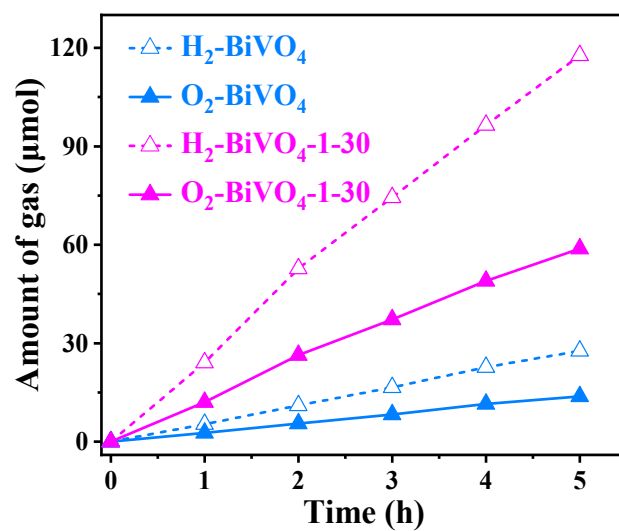

Fig. S5 The amount of H<sub>2</sub> and O<sub>2</sub> gases generated from the bare BiVO<sub>4</sub> and BiVO<sub>4</sub>-1-30 photoanodes at 1.23 V vs. RHE during 5 hours.



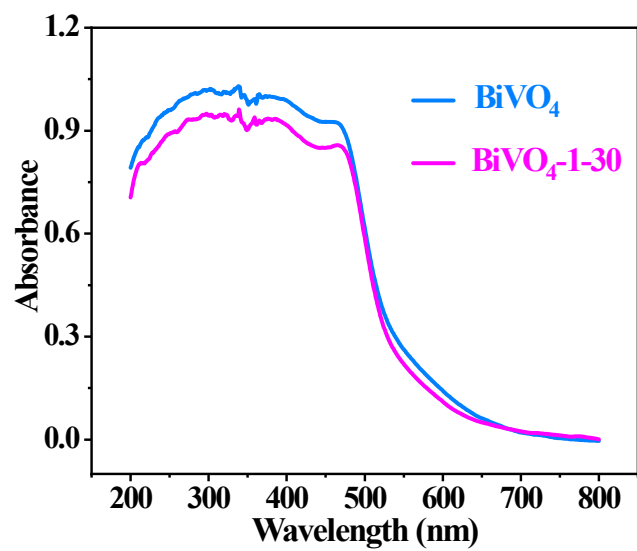

Fig. S6 The UV-vis diffuse reflectance spectra (DRS) of bare BiVO<sub>4</sub> and BiVO<sub>4</sub>-1-30 photoanodes.

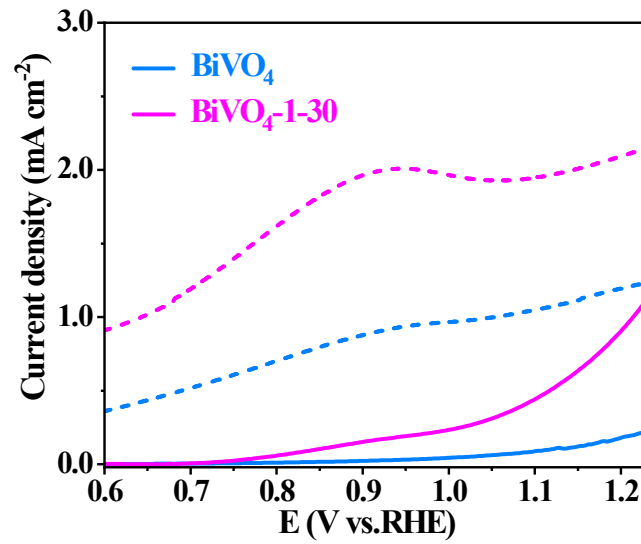

Fig. S7 LSV curves for sulfite oxidation and H<sub>2</sub>O oxidation measured in the electrolytes of 0.1 M Na<sub>2</sub>SO<sub>4</sub> containing 0.1 M Na<sub>2</sub>SO<sub>3</sub> (broken lines) and without Na<sub>2</sub>SO<sub>3</sub> (solid lines) of bare BiVO<sub>4</sub> and BiVO<sub>4</sub>-1-30 photoanodes.

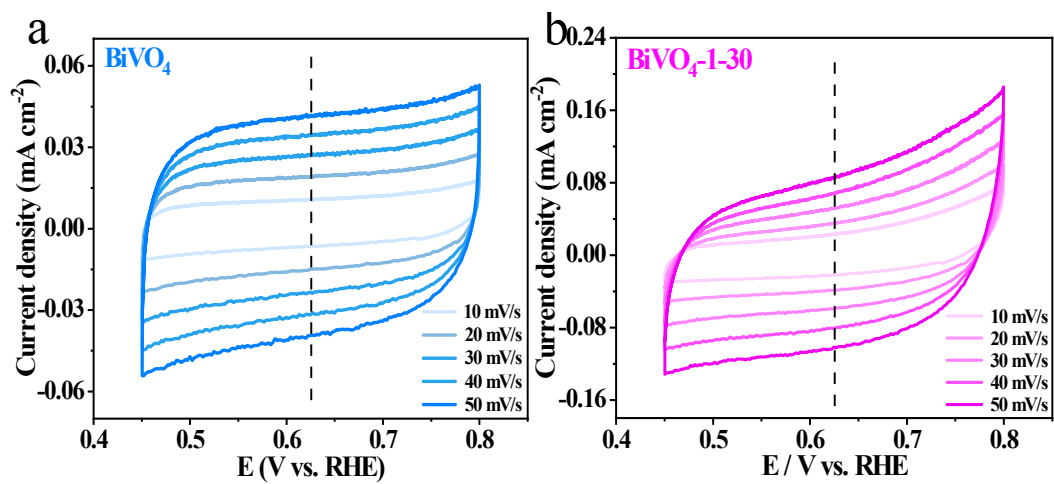

Fig. S8 Cyclic voltammograms for (a) bare  $\text{BiVO}_4$ , (b)  $\text{BiVO}_4$ -1-30 photoanodes at different scan rates (10, 20, 30, 40 and 50  $\text{mV s}^{-1}$ ).

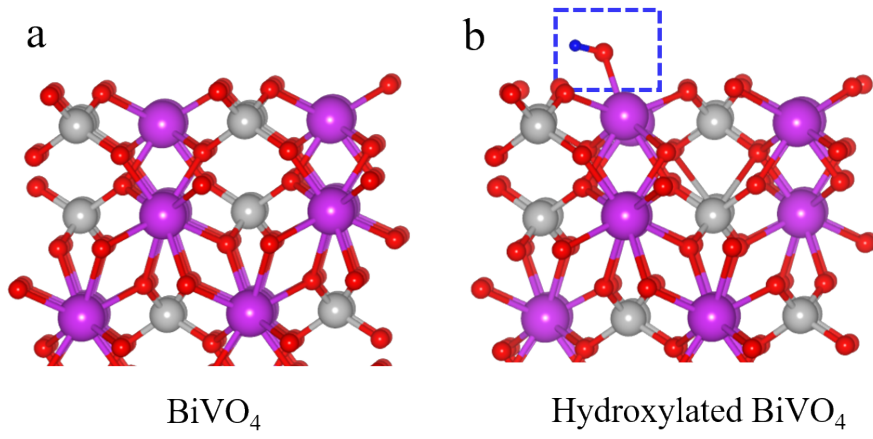

Fig. S9 Theoretical models of (a) bare  $\text{BiVO}_4$  and (b) hydroxylated  $\text{BiVO}_4$ .

Table S1 The PEC water oxidation properties and preparation methods of the reported BiVO<sub>4</sub>-based photoanodes.

| Catalysts                                                             | Fabrication method                                          | Electrolyte                           | Performance                                                                                                                                                       | References |
|-----------------------------------------------------------------------|-------------------------------------------------------------|---------------------------------------|-------------------------------------------------------------------------------------------------------------------------------------------------------------------|------------|
| BiVO <sub>4</sub>                                                     | in-situ hydrothermal                                        | 0.1 M Na <sub>2</sub> SO <sub>4</sub> | J=0.24 mA cm <sup>-2</sup> , η <sub>sep</sub> =16.45%, η <sub>inj</sub> =19.22% at 1.23 V <sub>RHE</sub> ,<br>ABPE=0.014% at 1.05 V <sub>RHE</sub> and IPCE=3.69% | This work  |
| Surface hydroxylated BiVO <sub>4</sub>                                | in-situ hydrothermal and immersion                          | 0.1 M Na <sub>2</sub> SO <sub>4</sub> | J=1.14 mA cm <sup>-2</sup> , η <sub>sep</sub> =28.7%, η <sub>inj</sub> =53.16% at 1.23 V <sub>RHE</sub> ,<br>ABPE=0.049% at 1.09 V <sub>RHE</sub> and IPCE=16%    |            |
| BiVO <sub>4</sub>                                                     | repeated spin coating/calcination procedure and anneal      | 0.1 M Na <sub>2</sub> SO <sub>4</sub> | J=0.18 mA cm <sup>-2</sup> at 1.23 V <sub>RHE</sub>                                                                                                               | 2          |
| Ag-BiVO <sub>4</sub> /BiFeO <sub>3</sub>                              |                                                             | 0.1 M Na <sub>2</sub> SO <sub>4</sub> | J=0.72 mA cm <sup>-2</sup> at 1.23 V <sub>RHE</sub>                                                                                                               |            |
| BiVO <sub>4</sub>                                                     | chemical solution deposition and hydrothermal               | 0.5 M Na <sub>2</sub> SO <sub>4</sub> | J=0.5 mA cm <sup>-2</sup> , ABPE=0.074% at 0.312 V <sub>RHE</sub> and<br>IPCE=16.14%                                                                              | 3          |
| BiVO <sub>4</sub> /CoNiO <sub>2</sub>                                 |                                                             | 0.5 M Na <sub>2</sub> SO <sub>4</sub> | J=1.16 mA cm <sup>-2</sup> , ABPE=0.163% at 0.312 V <sub>RHE</sub> and<br>IPCE=34.37%                                                                             |            |
| BiVO <sub>4</sub>                                                     | electrodeposition and calcination                           | 0.2 M Na <sub>2</sub> SO <sub>4</sub> | J=0.35 mA cm <sup>-2</sup> , ABPE=0.028% at 0.9 V <sub>RHE</sub> and IPCE=14.7%                                                                                   | 4          |
| α-FOOH/BiVO <sub>4</sub>                                              | electrodeposition, calcination and chemical bath deposition |                                       | J=2.64 mA cm <sup>-2</sup> , ABPE=0.59% at 0.9 V <sub>RHE</sub> and<br>IPCE=62.7%                                                                                 |            |
| BiVO <sub>4</sub>                                                     | multistep electrodeposition and annealed                    | 0.1 M PBS                             | J=0.18 mA cm <sup>-2</sup> , η <sub>sep</sub> =18.2%, η <sub>inj</sub> <10% at 1.23 V <sub>RHE</sub> ,<br>ABPE=0.03% at 0.8 V <sub>RHE</sub> and IPCE=62.7%       | 5          |
| BiVO <sub>4</sub> /SnO <sub>2</sub>                                   |                                                             |                                       | J=0.56 mA cm <sup>-2</sup> , ABPE=0.08% at 0.8 V <sub>RHE</sub> and<br>IPCE=62.7%                                                                                 |            |
| NiWO <sub>4</sub> /BiVO <sub>4</sub> /SnO <sub>2</sub>                |                                                             |                                       | J=0.93 mA cm <sup>-2</sup> , η <sub>sep</sub> =23%, η <sub>inj</sub> =30% at 1.23 V <sub>RHE</sub> ,<br>ABPE=0.21% at 0.8 V <sub>RHE</sub> and IPCE=62.7%         |            |
| BiVO <sub>4</sub>                                                     | electrodeposition and anneal transformation                 | 0.5 M Na <sub>2</sub> SO <sub>4</sub> | J=0.47 mA cm <sup>-2</sup> , η <sub>sep</sub> =40%, η <sub>inj</sub> =18% at 1.23 V <sub>RHE</sub> ,<br>ABPE=0.11% at 1.03 V <sub>RHE</sub> and IPCE=10%          | 6          |
| BiVO <sub>4</sub> /Bi <sub>2</sub> S <sub>3</sub>                     | high temperature ion exchange and anneal                    |                                       | J=0.92 mA cm <sup>-2</sup> , η <sub>sep</sub> =47%, η <sub>inj</sub> =35% at 1.23 V <sub>RHE</sub> ,<br>ABPE=0.21% at 1.07 V <sub>RHE</sub> and IPCE=21%          |            |
| BiVO <sub>4</sub> /Bi <sub>2</sub> S <sub>3</sub> /NiCoO <sub>2</sub> | drop casting and anneal                                     |                                       | J=2.58 mA cm <sup>-2</sup> , η <sub>sep</sub> =54%, η <sub>inj</sub> =80% at 1.23 V <sub>RHE</sub> ,<br>ABPE=0.62% at 1.11 V <sub>RHE</sub> and IPCE=42%          |            |

Table S2 The reported typically surface hydroxylation methods.

| <b>Catalysts</b>                                  | <b>Fabracation method</b>                                         | <b>Application field</b>                                          | <b>References</b> |
|---------------------------------------------------|-------------------------------------------------------------------|-------------------------------------------------------------------|-------------------|
| BiVO <sub>4</sub>                                 | post-synthetic NaOH immersion                                     | photoelectrochemical water oxidation                              | This work         |
| $\alpha$ -Fe <sub>2</sub> O <sub>3</sub>          | ultrasonically treating in water                                  | photoelectrochemical water oxidation                              | 7                 |
| TiO <sub>2</sub> /g-C <sub>3</sub> N <sub>4</sub> | plasma treating                                                   | photo-Fenton degradation of tetracycline                          | 8                 |
| g-C <sub>3</sub> N <sub>4</sub>                   | high temperature heating with mixed NaOH                          | photocatalytic degradation of phenol                              | 9                 |
| g-C <sub>3</sub> N <sub>4</sub>                   | ultrasonically treating in H <sub>2</sub> O <sub>2</sub> solution | photocatalytic CO <sub>2</sub> reduction                          | 10                |
| Zn <sub>2</sub> GeO <sub>4</sub>                  | hydrothermally treating in NaOH solution                          | photocatalytic conversion of CO <sub>2</sub> into CH <sub>4</sub> | 11                |
| polymeric carbon nitride                          | hydrothermal route in water                                       | photocatalytic H <sub>2</sub> evolution                           | 12                |
| SiO <sub>2</sub> /g-C <sub>3</sub> N <sub>4</sub> | heating reflux in H <sub>2</sub> O <sub>2</sub> solution          | photocatalytic degradation rate of rhodamine B                    | 13                |

## References

- [1] X. Lv, X. Xiao, M. Cao, Y. Bu, C. Wang, M. Wang and Y. Shen, *Appl. Surf. Sci.*, 2018, **439**, 1065-1071.
- [2] T. Soltani and B. Lee, *Sci. Total Environ.*, 2020, **736**, 138640.
- [3] G. Fang, Z. Liu, C. Han, X. Ma, H. Lv, C. Huang, Z. Cheng, Z. Tong and P. Wang, *Chem. Commun.*, 2020, **56**, 9158.
- [4] W. Zhang, J. Ma, L. Xiong, H. Jiang and J. Tang, *ACS Appl. Energy Mater.*, 2020, **3**, 5927-5936.
- [5] M. Shaddad, P. Arunachalam, M. Hezam and A. Al-Mayouf, *Catalysts*, 2019, **9**, 879.
- [6] S. Majumder, M. Gu and K. Kim, *Appl. Surf. Sci.*, 2022, **574**, 151562.
- [7] C. Tang, B. Sun, M. Li, J. Zhang, X. Fan, F. Gao, Y. Tong, L. Dong and Y. Li, *J. Mater. Chem. A*, 2019, **7**, 8050.
- [8] Y. Li, Q. Zhang, Y. Lu, Z. Song, C. Wang, D. Li, X. Tang and X. Zhou, *Ceram. Int.*, 2022, **48**, 1306-1313.
- [9] J. Ma, C. Liang, H. Li, H. Xu, Y. Hua and C. Wang, *Appl. Surf. Sci.*, 2021, **546**, 149085.
- [10] I. Khan, X. Chu, I. Khan, H. Liu, W. Li, L. Bai and L. Jing, *Mater. Res. Bull.*, 2020, **130**, 110926.
- [11] S. Yan, J. Wang, Z. Zou and *Dalton Trans.*, 2013, **42**, 12975.
- [12] S. Yu, J. Li, Y. Zhang, M. Li, F. Dong, T. Zhang and H. Huang, *Nano Energy*, 2018, **50**, 383-392.
- [13] S. Sun, C. Li, Z. Sun, J. Wang, X. Wang and H. Ding, *Chem. Eng. J.*, 2021, **416**, 129107.
